# Supplementary material for: Accelerometric Classification of Resting and Postural Tremor Amplitude
Source: MDPI journal article supplement (doi:10.3390/s23208621), 2023-10-21
Supplement: s1 [file s1]

## Supplementary Materials

### Supplementary Material S1—Illustration of devices & recording locations

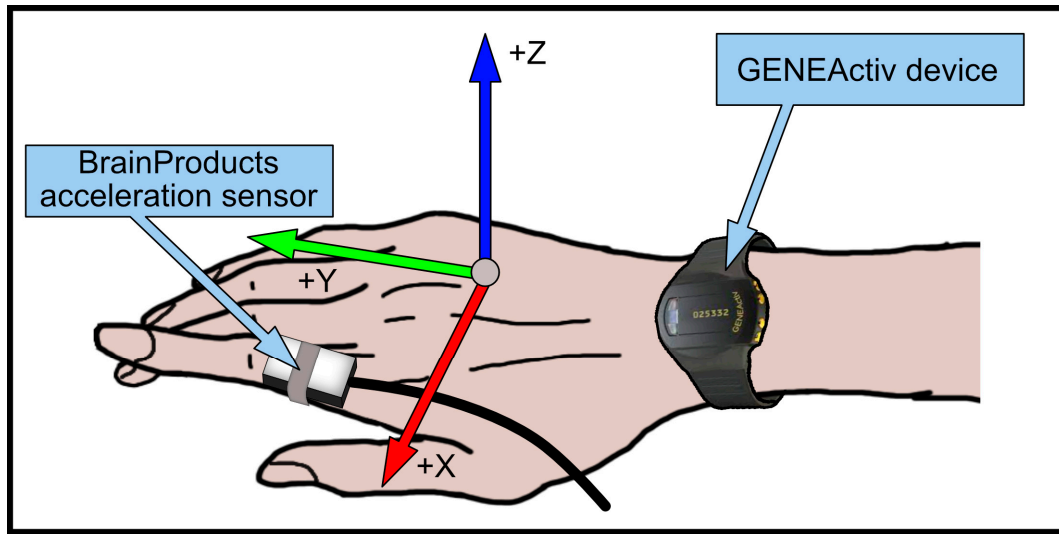

**Figure S1.** Schematic overview of the employed devices, the recording locations, and the coordinate system used in this study.

### Supplementary Material S2—Logarithmic relationships

Analogous to Figures S2 & S3 of the manuscript, which provided results for Steven's power relationships, we here provide results for modeling and classifying the logarithmic relationships for resting and postural tremors.

## Resting Tremor

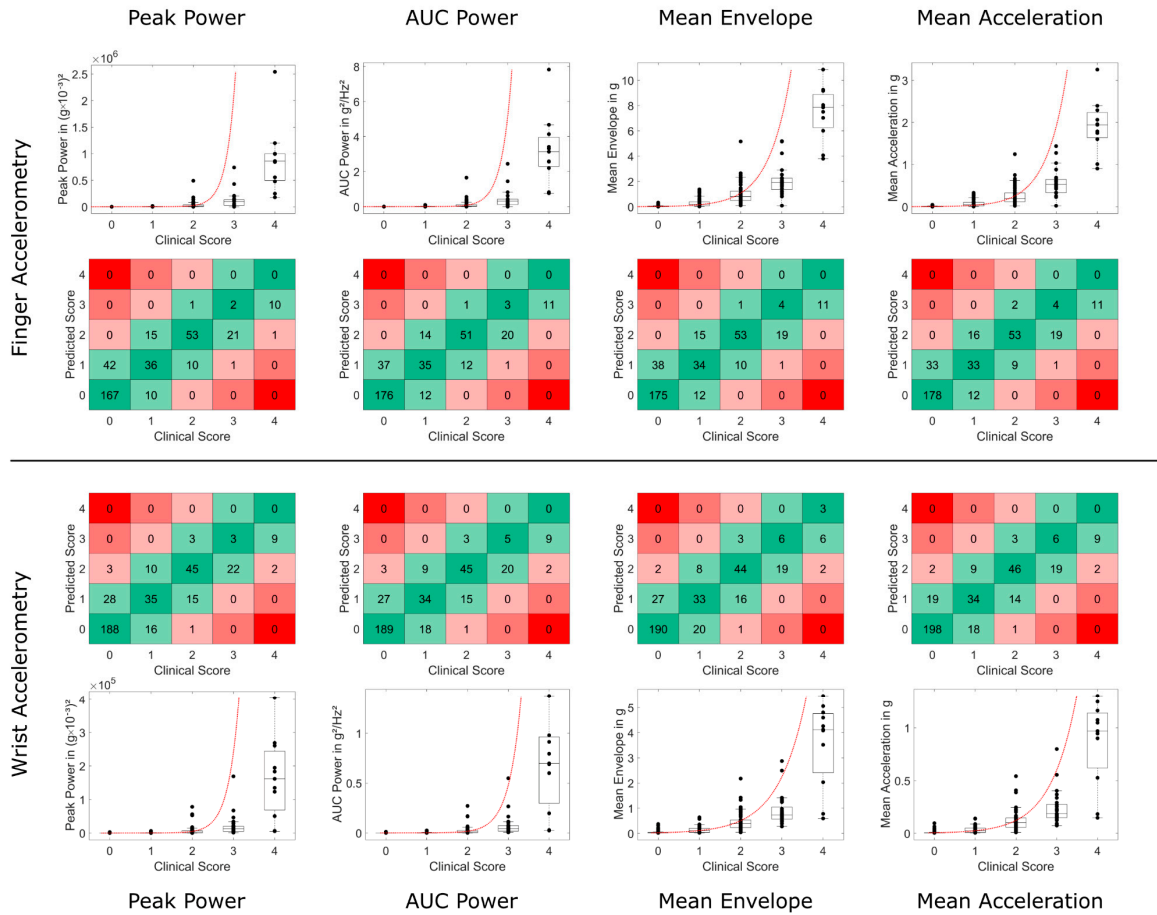

**Figure S2.** Comparison of accelerometry metrics and clinical scores for resting tremor for logarithmic relationship. Data on finger and wrist accelerometry are shown in the two upper and lower rows, respectively. Boxplots and black data points illustrate the validation data and the logarithmic model trained on the training data (in red). Square plots depict deviations between the predicted tremor score and clinical tremor rating of more than 1 point in red (2 points deviation in light red, 3 and 4 points deviation in dark red). High agreement (no deviation) is highlighted in dark green, deviation of only 1 point in light green.

## Postural Tremor

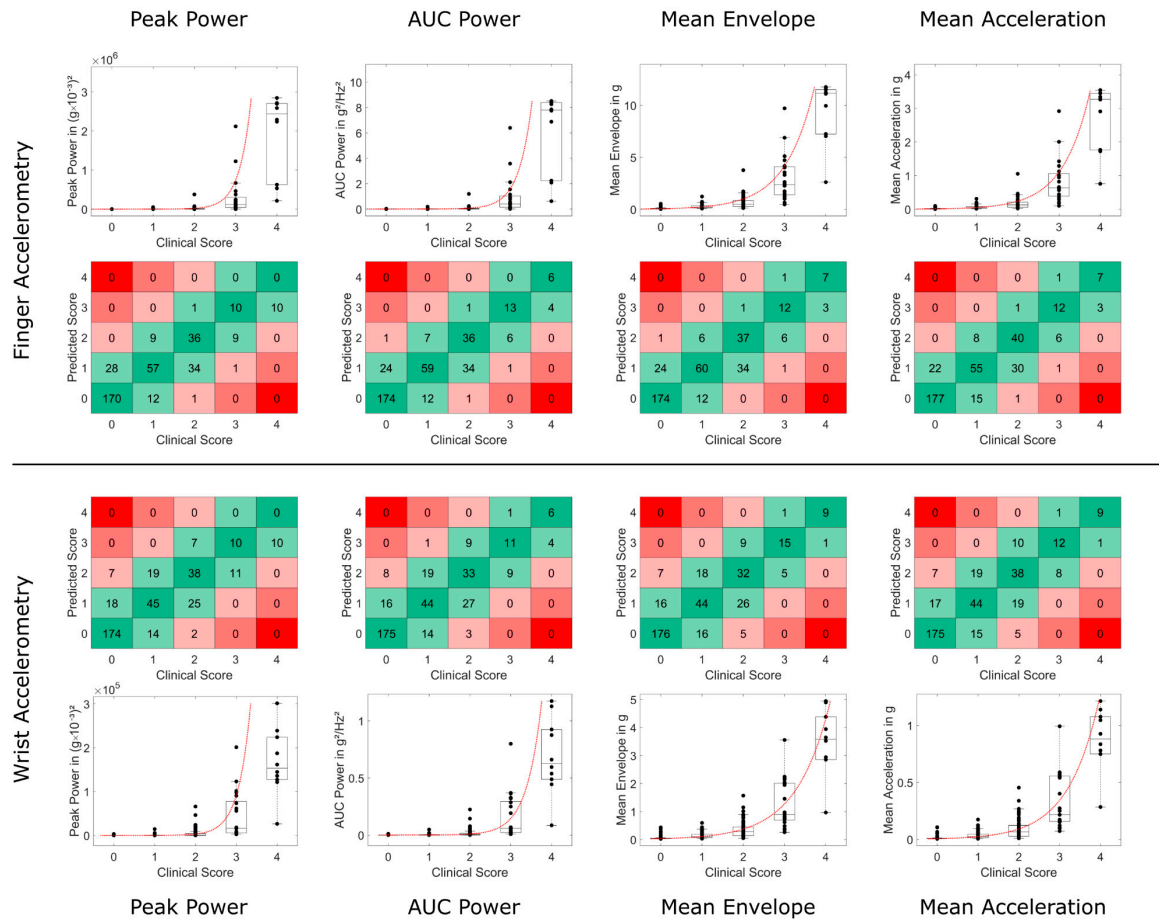

**Figure S3:** Comparison of accelerometry metrics and clinical scores for postural tremor for logarithmic relationship. Data on finger and wrist accelerometry are shown in the two upper and lower rows, respectively. Boxplots and black data points depict the validation data and the logarithmic model trained on the training data (in red). Square plots show deviations between the predicted tremor score and clinical tremor rating of more than 1 point in red (2 points deviation in light red, 3 and 4 points deviation in dark red). High agreement (no deviation) is highlighted in dark green, deviation of only 1 point in light green.

### Supplementary Material S3—Classification Results for Second Rater

Analogous to Tables S1 & S2 of the main manuscript, these tables provide the classification results when comparing our trained models with the data rated by the second rater (GB).

**Table S1:** Model parameters and prediction accuracies for logarithmic relationship models, rated by a second rater. The best tremor metrics for each tremor type and accelerometry location are highlighted in grey. AUC Power = area under the power spectral density curve, RMSE = root mean standard error.

| Tremortype      | Location | Metric            | TR = $a \times \ln(T) + b$ |        | RMSE  | Weighted Kappa | Concordance | 1 Pt Deviation | >1 Pt Deviation |
|-----------------|----------|-------------------|----------------------------|--------|-------|----------------|-------------|----------------|-----------------|
|                 |          |                   | a                          | b      |       |                |             |                |                 |
| Resting Tremor  | Finger   | Peak Power        | 0.223                      | -0.257 | 0.791 | 0.629          | 54.5 %      | 38.4 %         | 7.1 %           |
|                 |          | AUC Power         | 0.244                      | 2.601  | 0.781 | 0.656          | 56.6 %      | 38.4 %         | 5.1 %           |
|                 |          | Mean Envelope     | 0.532                      | 1.958  | 0.757 | 0.671          | 58.6 %      | 36.4 %         | 5.1 %           |
|                 |          | Mean Acceleration | 0.502                      | 2.68   | 0.739 | 0.669          | 56.6 %      | 39.4 %         | 4 %             |
|                 | Wrist    | Peak Power        | 0.258                      | 3.368  | 0.812 | 0.634          | 55 %        | 38 %           | 7 %             |
|                 |          | AUC Power         | 0.3                        | 3.22   | 0.782 | 0.636          | 54 %        | 40 %           | 6 %             |
|                 |          | Mean Envelope     | 0.671                      | 2.456  | 0.76  | 0.675          | 56 %        | 41 %           | 3 %             |
|                 |          | Mean Acceleration | 0.631                      | 3.321  | 0.749 | 0.652          | 54 %        | 42 %           | 4 %             |
| Postural Tremor | Finger   | Peak Power        | 0.281                      | 3.084  | 0.699 | 0.654          | 59.6 %      | 36.4 %         | 4 %             |
|                 |          | AUC Power         | 0.318                      | 2.852  | 0.658 | 0.716          | 64.6 %      | 33.3 %         | 2 %             |
|                 |          | Mean Envelope     | 0.701                      | 1.997  | 0.637 | 0.728          | 64.6 %      | 34.3 %         | 1 %             |
|                 |          | Mean Acceleration | 0.655                      | 2.932  | 0.648 | 0.719          | 65.7 %      | 31.3 %         | 3 %             |
|                 | Wrist    | Peak Power        | 0.296                      | 3.707  | 0.749 | 0.643          | 58 %        | 37 %           | 5 %             |
|                 |          | AUC Power         | 0.363                      | 3.7    | 0.692 | 0.676          | 59 %        | 38 %           | 3 %             |
|                 |          | Mean Envelope     | 0.819                      | 2.802  | 0.681 | 0.702          | 62 %        | 35 %           | 3 %             |
|                 |          | Mean Acceleration | 0.761                      | 3.812  | 0.698 | 0.693          | 62 %        | 35 %           | 3 %             |

**Table S2:** Model parameters and prediction accuracies for Steven's power relationships models, rated by a second rater. The best tremor metrics for each tremor type and accelerometry location are highlighted in grey. AUC Power = area under the power spectral density curve, RMSE = root mean standard error.

| Tremortype      | Location | Metric            | TR = $a \times T^b + c$ |        |       | RMSE  | Weighted Kappa | Concordance | 1 Pt Deviation | >1 Pt Deviation |
|-----------------|----------|-------------------|-------------------------|--------|-------|-------|----------------|-------------|----------------|-----------------|
|                 |          |                   | a                       | b      | c     |       |                |             |                |                 |
| Resting Tremor  | Finger   | Peak Power        | 0.757                   | -0.83  | 0.13  | 0.713 | 0.724          | 64.6 %      | 31.3 %         | 4 %             |
|                 |          | AUC Power         | 3.963                   | -0.872 | 0.136 | 0.721 | 0.731          | 65.7 %      | 30.3 %         | 4 %             |
|                 |          | Mean Envelope     | 2.985                   | -1.106 | 0.257 | 0.709 | 0.717          | 62.6 %      | 34.3 %         | 3 %             |
|                 |          | Mean Acceleration | 4.315                   | -1.244 | 0.226 | 0.691 | 0.738          | 65.7 %      | 31.3 %         | 3 %             |
|                 | Wrist    | Peak Power        | 1.586                   | -1.669 | 0.098 | 0.782 | 0.654          | 55 %        | 40 %           | 5 %             |
|                 |          | AUC Power         | 6.919                   | -3.28  | 0.069 | 0.774 | 0.654          | 54 %        | 42 %           | 4 %             |
|                 |          | Mean Envelope     | 6.793                   | -4.296 | 0.123 | 0.759 | 0.692          | 59 %        | 38 %           | 3 %             |
|                 |          | Mean Acceleration | 9.522                   | -5.949 | 0.089 | 0.747 | 0.669          | 56 %        | 40 %           | 4 %             |
| Postural Tremor | Finger   | Peak Power        | 2.398                   | -2.872 | 0.071 | 0.666 | 0.681          | 60.6 %      | 36.4 %         | 3 %             |
|                 |          | AUC Power         | 8.164                   | -5.153 | 0.05  | 0.642 | 0.694          | 62.6 %      | 34.3 %         | 3 %             |
|                 |          | Mean Envelope     | 7.471                   | -5.496 | 0.105 | 0.625 | 0.725          | 63.6 %      | 35.4 %         | 1 %             |

|       |                   |        |        |       |       |       |        |        |     |
|-------|-------------------|--------|--------|-------|-------|-------|--------|--------|-----|
|       | Mean Acceleration | 11.214 | -8.17  | 0.07  | 0.639 | 0.705 | 62.6 % | 35.4 % | 2 % |
| Wrist | Peak Power        | 1.346  | -1.492 | 0.119 | 0.708 | 0.665 | 59 %   | 36 %   | 5 % |
|       | AUC Power         | 10.157 | -6.048 | 0.05  | 0.683 | 0.704 | 62 %   | 35 %   | 3 % |
|       | Mean Envelope     | 12.235 | -9.358 | 0.077 | 0.678 | 0.695 | 62 %   | 35 %   | 3 % |
|       | Mean Acceleration | 11.378 | -7.186 | 0.091 | 0.694 | 0.704 | 63 %   | 34 %   | 3 % |
